# Supplementary material
Source: Springer Nature journal article supplement (https://www.springermedizin.de/resource/supplementary/12889_2008_1306_MOESM1_ESM.pdf/9502908)

Serum 25(OH)D (nmol/L)

120  
100  
80  
60  
40  
20  
0

East Asian

European

South Asian

Ancestry

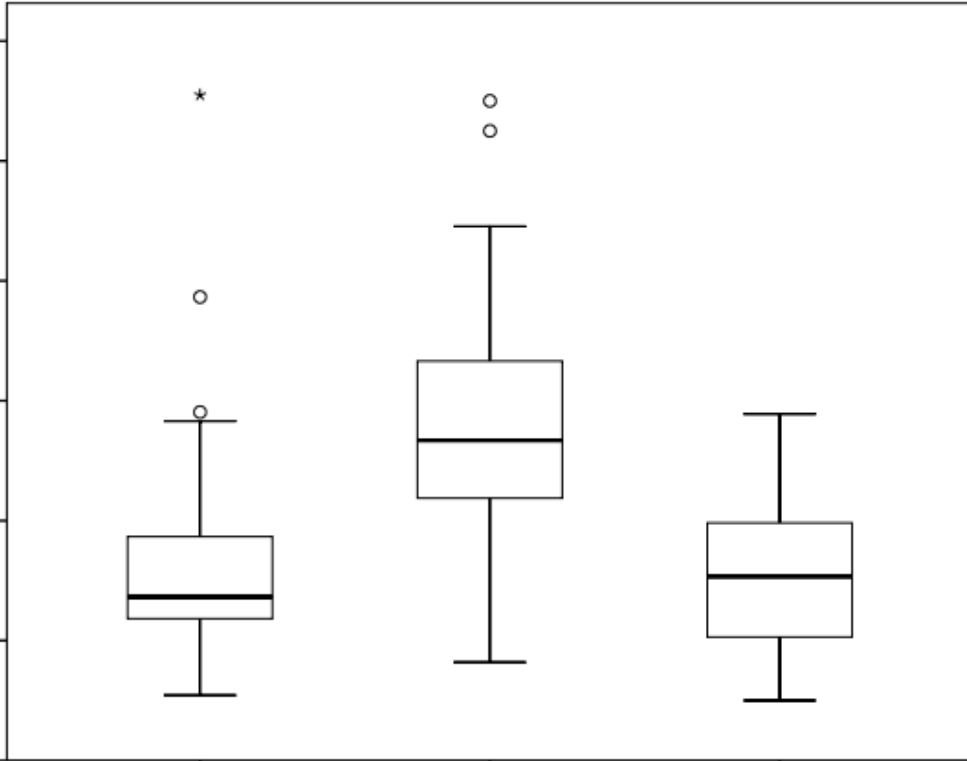

Supplement: MOESM1 [file 9502908]
